# Supplementary material for: Distribution of selected healthcare resources for influenza pandemic response in Cambodia
Source: PubMed Central journal article supplement (PMC3851316; doi:10.1186/1475-9276-12-82), 2013-10-04

### NHMF-based Doctors per Capita, Excluding Phnom Penh

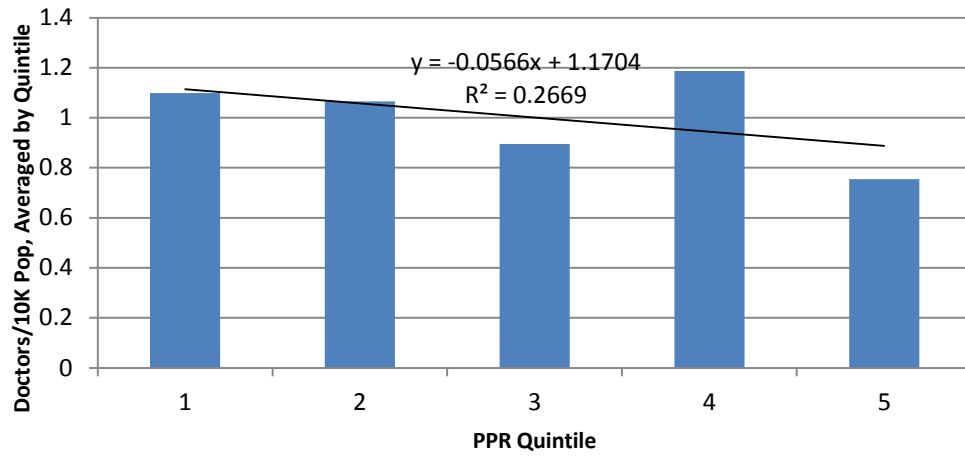

Supplement: 1475-9276-12-82-S3.pdf [file 1475-9276-12-82-S3.pdf]
